# Supplementary material for: Intraglandular Off-the-Shelf Allogeneic Mesenchymal Stem Cell Treatment in Patients with Radiation-Induced Xerostomia: A Safety Study (MESRIX-II)
Source: PubMed Central journal article supplement (PMC9154319; doi:10.1093/stcltm/szac011), 2022-04-18
Supplement: szac011_suppl_supplementary_material_3.pdf [file szac011_suppl_supplementary_material_3.pdf]

## Confirmation of Publication and Licensing Rights

January 30th, 2022  
Science Suite Inc.

**Subscription:** Individual  
**Agreement number:** BZ23I4EQOQ  
**Journal name:** Stem Cells Translational Medicine

To whom this may concern,

This document is to confirm that Charlotte Lynggaard has been granted a license to use the BioRender content, including icons, templates and other original artwork, appearing in the attached completed graphic pursuant to BioRender's [Academic License Terms](#). This license permits BioRender content to be sublicensed for use in journal publications.

All rights and ownership of BioRender content are reserved by BioRender. All completed graphics must be accompanied by the following citation: "Created with BioRender.com".

BioRender content included in the completed graphic is not licensed for any commercial uses beyond publication in a journal. For any commercial use of this figure, users may, if allowed, recreate it in BioRender under an Industry BioRender Plan.

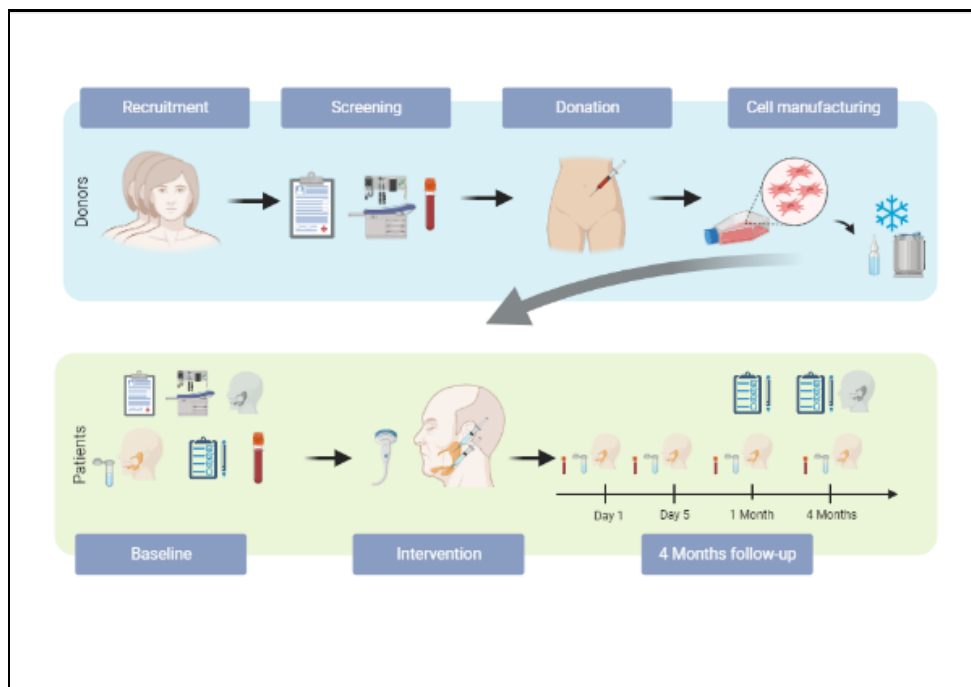

For any questions regarding this document, or other questions about publishing with BioRender refer to our [BioRender Publication Guide](#), or contact BioRender Support at [support@biorender.com](mailto:support@biorender.com).
